# Supplementary material
Source: MDPI journal article supplement (https://www.mdpi.com/2073-4433/13/12/2122)
Supplement: s1 [file s1]

## Supplementary Materials:

**Table S1.** Soil profile inputs at the target locations for DSSAT-CSM-CERES-Sorghum model. CNRA, NRIP, SINT and KOLD represent Bambey, Nioro du Rip, Sinthiou Malème and Kolda, respectively.

| SLB         | SLLL | SDUL | SSAT | SRGF | SSKS | SBDM | SLOC | SLCL | SLSI | SLNI | SLHW | SCEC |
|-------------|------|------|------|------|------|------|------|------|------|------|------|------|
| <b>CNRA</b> |      |      |      |      |      |      |      |      |      |      |      |      |
| 10          | .028 | .089 | .4   | 1    | -99  | -99  | .16  | .4   | 17.1 | .01  | 7.9  | 8    |
| 20          | .039 | .092 | .403 | 1    | -99  | -99  | .33  | 5.8  | 15.1 | .03  | 7.8  | 9    |
| 30          | .048 | .103 | .393 | 1    | -99  | -99  | .215 | .7   | 15   | .01  | 7.7  | 9    |
| 40          | .048 | .103 | .393 | .54  | -99  | -99  | .312 | 6.2  | 19.7 | .03  | 6.9  | 10   |
| 50          | .048 | .103 | .393 | .54  | -99  | -99  | .273 | 9.2  | 20.7 | .03  | 6.6  | 18   |
| <b>NRIP</b> |      |      |      |      |      |      |      |      |      |      |      |      |
| 10          | .1   | .162 | .38  | 1    | 21   | 1.43 | .211 | .211 | 3.5  | .04  | 6.1  | -99  |
| 20          | .12  | .188 | .373 | .9   | 21   | 1.46 | .211 | .211 | 4.5  | .05  | 6.0  | -99  |
| 30          | .133 | .195 | .358 | .8   | 21   | 1.46 | .211 | .211 | 2.8  | .05  | 5.9  | -99  |
| 40          | .12  | .18  | .37  | .54  | -99  | 1.48 | .09  | .09  | 1.7  | .02  | 5.8  | 2.7  |
| 60          | .13  | .19  | .36  | .40  | -99  | 1.47 | .09  | .09  | 1.6  | .02  | 5.8  | 2.9  |
| 80          | .14  | .2   | .38  | .00  | -99  | 1.57 | .09  | .09  | 1.7  | .02  | 5.8  | 3.4  |
| 100         | .15  | .22  | .4   | .00  | -99  | 1.44 | .09  | .09  | 1.8  | .04  | 5.8  | 3.6  |
| <b>SINT</b> |      |      |      |      |      |      |      |      |      |      |      |      |
| 10          | .048 | .097 | .395 | 1    | 21   | 1.48 | .211 | 2.7  | 4.2  | .04  | 5.7  | -99  |
| 20          | .047 | .095 | .392 | 1    | 21   | 1.49 | .272 | 2.6  | 4.2  | .04  | 5.3  | -99  |
| 30          | .048 | .094 | .392 | .607 | 21   | 1.49 | .259 | 2.9  | 3.5  | .04  | 5.5  | -99  |
| 40          | .102 | .169 | .383 | .497 | 2.59 | 1.57 | .208 | 12.4 | 7.8  | .04  | 6.2  | -99  |
| 50          | .129 | .203 | .386 | .407 | 2.59 | 1.56 | .156 | 17.5 | 9.1  | .04  | 6.7  | -99  |
| 60          | .138 | .209 | .38  | .333 | .43  | 1.58 | .096 | 20.2 | 9    | .06  | 6.4  | -99  |
| 80          | .173 | .244 | .384 | 0    | .43  | 1.57 | .096 | 27.2 | 7    | .06  | 6.4  | -99  |
| 100         | .178 | .251 | .384 | 0    | .43  | 1.57 | .092 | 28.2 | 7.5  | .04  | 6.4  | -99  |
| 120         | .162 | .234 | .38  | 0    | .43  | 1.58 | .092 | 25.1 | 7.7  | .04  | 6.4  | -99  |
| 140         | .167 | .243 | .384 | 0    | .43  | 1.57 | .087 | 26.1 | 9.6  | .04  | 6.4  | -99  |
| 160         | .048 | .098 | .416 | 0    | 21   | 1.48 | .087 | 2.2  | 4    | .04  | 6.4  | -99  |
| <b>KOLD</b> |      |      |      |      |      |      |      |      |      |      |      |      |
| 20          | .113 | .206 | .331 | 1    | 2.59 | 1.34 | .8   | 19   | 27   | -99  | 5.1  | 4    |
| 40          | .089 | .165 | .278 | .9   | 2.59 | 1.46 | .715 | 18   | 26   | -99  | 5    | 4    |
| 60          | .088 | .16  | .301 | .2   | 2.59 | 1.48 | .22  | 18   | 26   | -99  | 5.3  | 3.8  |
| 80          | .08  | .151 | .293 | .0   | 2.59 | 1.51 | .2   | 16   | 26   | -99  | 5.4  | 3.5  |
| 100         | .053 | .101 | .298 | 0    | 2.59 | 1.54 | .154 | 15   | 26   | -99  | 5.4  | 3    |
| 120         | .026 | .348 | .456 | 0    | 0.06 | 1.37 | .320 | 45   | 11   | -99  | 5    | 4    |

SLB: Depth, base of layer(cm)

SLLL: Soil water content at wilting point ( $\text{cm}^3 \text{cm}^{-3}$ )

SDUL: Soil water content at field capacity ( $\text{cm}^3 \text{cm}^{-3}$ )

SSAT: Soil water content at saturation ( $\text{cm}^3 \text{cm}^{-3}$ )

SRGF: Root growth factor, 0.0 to 1.0

SSKS: Saturated hydraulic conductivity ( $\text{cm h}^{-1}$ )

SBDM: Bulk density ( $\text{g cm}^{-3}$ )

SLOC: Organic carbon (%)

SLCL: Clay ( $<0.002 \text{ mm}$ ) (%)

SLSI: Silt ( $0.05 \text{ to } 0.002 \text{ mm}$ ) (%)

SLCF: Coarse fraction ( $>2 \text{ mm}$ ) (%)

SLNI: Total nitrogen (%)

SLHW: pH in water

SCEC: Cation exchange capacity ( $\text{cmol kg}^{-1}$ )

\*-99 indicates that no measured data available.

**Table S2.** Calibrated genetic coefficient of CSM-CERES-Sorghum model for Fadda sorghum cultivar in Senegal

| P1  | P2  | P2O  | P2R | PANTH | P3  | P4   | P5  | PHINT | G1 | G2 |
|-----|-----|------|-----|-------|-----|------|-----|-------|----|----|
| 200 | 300 | 12.6 | 655 | 617.5 | 185 | 81.5 | 380 | 49    | 15 | 3  |

P1 [ $^{\circ}\text{C day}$ ]: Potential duration from emergence to end of juvenile phase

P2 [ $^{\circ}\text{C day}$ ]: Potential duration from end of juvenile phase to panicle initiation

P2O [h]: Critical daylength above which development slows (short day response)

P2R [ $^{\circ}\text{C day}$ ]: Photoperiod sensitivity as the extent to which development is delayed for each hour of photoperiod above P2O

PANTH [ $^{\circ}\text{C day}$ ]: Duration from panicle initiation to anthesis

P3 [ $^{\circ}\text{C day}$ ]: Duration from end of flag leaf expansion to anthesis

P4 [ $^{\circ}\text{C day}$ ]: Duration from anthesis to onset of grain filling

P5 [ $^{\circ}\text{C day}$ ]: Duration of grain-filling phase (onset of grain filling to physiological maturity)

PHINT [ $^{\circ}\text{C day leaf}^{-1}$ ]: Phyllochron interval (the interval in thermal time between successive leaf tip appearances)

G1 [-]: Scaler for relative leaf size.

G2 [-]: Scaler for partitioning of assimilates to the panicle (head).

\*See more details on DSSAT-CERES-Sorghum model and genetic coefficients in White et al. [43] and the selected cultivars in Ganyo et al. [44]

**Table S3.** Summary statistics of estimated planting dates for each onset definition

|             | Onset Definition | Mean | Stdev | Min | max | Percentiles      |                  |                  |                  |                  |
|-------------|------------------|------|-------|-----|-----|------------------|------------------|------------------|------------------|------------------|
|             |                  |      |       |     |     | 10 <sup>th</sup> | 25 <sup>th</sup> | 50 <sup>th</sup> | 75 <sup>th</sup> | 90 <sup>th</sup> |
| <b>CNRA</b> | ANACIM           | 191  | 15    | 167 | 220 | 172              | 178              | 192              | 201              | 212              |
|             | BM               | 187  | 15    | 161 | 218 | 168              | 175              | 186              | 200              | 206              |
|             | AutoP(151)       | 185  | 16    | 160 | 216 | 167              | 172              | 182              | 200              | 207              |
|             | AutoP(166)       | 185  | 15    | 166 | 216 | 168              | 172              | 182              | 200              | 207              |
|             | Optimal          | 189  | 14    | 165 | 220 | 170              | 179              | 185              | 201              | 208              |
| <b>NRIP</b> | ANACIM           | 175  | 12    | 152 | 195 | 158              | 165              | 177              | 185              | 190              |
|             | BM               | 172  | 14    | 123 | 193 | 156              | 163              | 175              | 181              | 184              |
|             | AutoP(151)       | 170  | 12    | 152 | 197 | 155              | 161              | 170              | 179              | 183              |
|             | AutoP(166)       | 174  | 9     | 166 | 197 | 166              | 167              | 173              | 179              | 184              |
|             | Optimal          | 178  | 15    | 153 | 214 | 160              | 167              | 177              | 186              | 197              |
| <b>SINT</b> | ANACIM           | 168  | 17    | 139 | 214 | 148              | 157              | 166              | 181              | 188              |
|             | BM               | 159  | 14    | 131 | 183 | 141              | 150              | 160              | 168              | 176              |
|             | AutoP(151)       | 165  | 9     | 151 | 187 | 152              | 159              | 164              | 172              | 175              |
|             | AutoP(166)       | 170  | 5     | 166 | 187 | 166              | 166              | 170              | 173              | 177              |
|             | Optimal          | 170  | 10    | 151 | 200 | 159              | 162              | 171              | 177              | 181              |
| <b>KOLD</b> | ANACIM           | 161  | 14    | 130 | 191 | 142              | 153              | 160              | 172              | 174              |
|             | BM               | 160  | 14    | 131 | 192 | 141              | 152              | 159              | 168              | 174              |
|             | AutoP(151)       | 163  | 9     | 151 | 197 | 153              | 158              | 160              | 167              | 172              |
|             | AutoP(166)       | 169  | 6     | 166 | 197 | 166              | 166              | 167              | 171              | 173              |
|             | Optimal          | 166  | 9     | 152 | 197 | 156              | 160              | 165              | 170              | 176              |

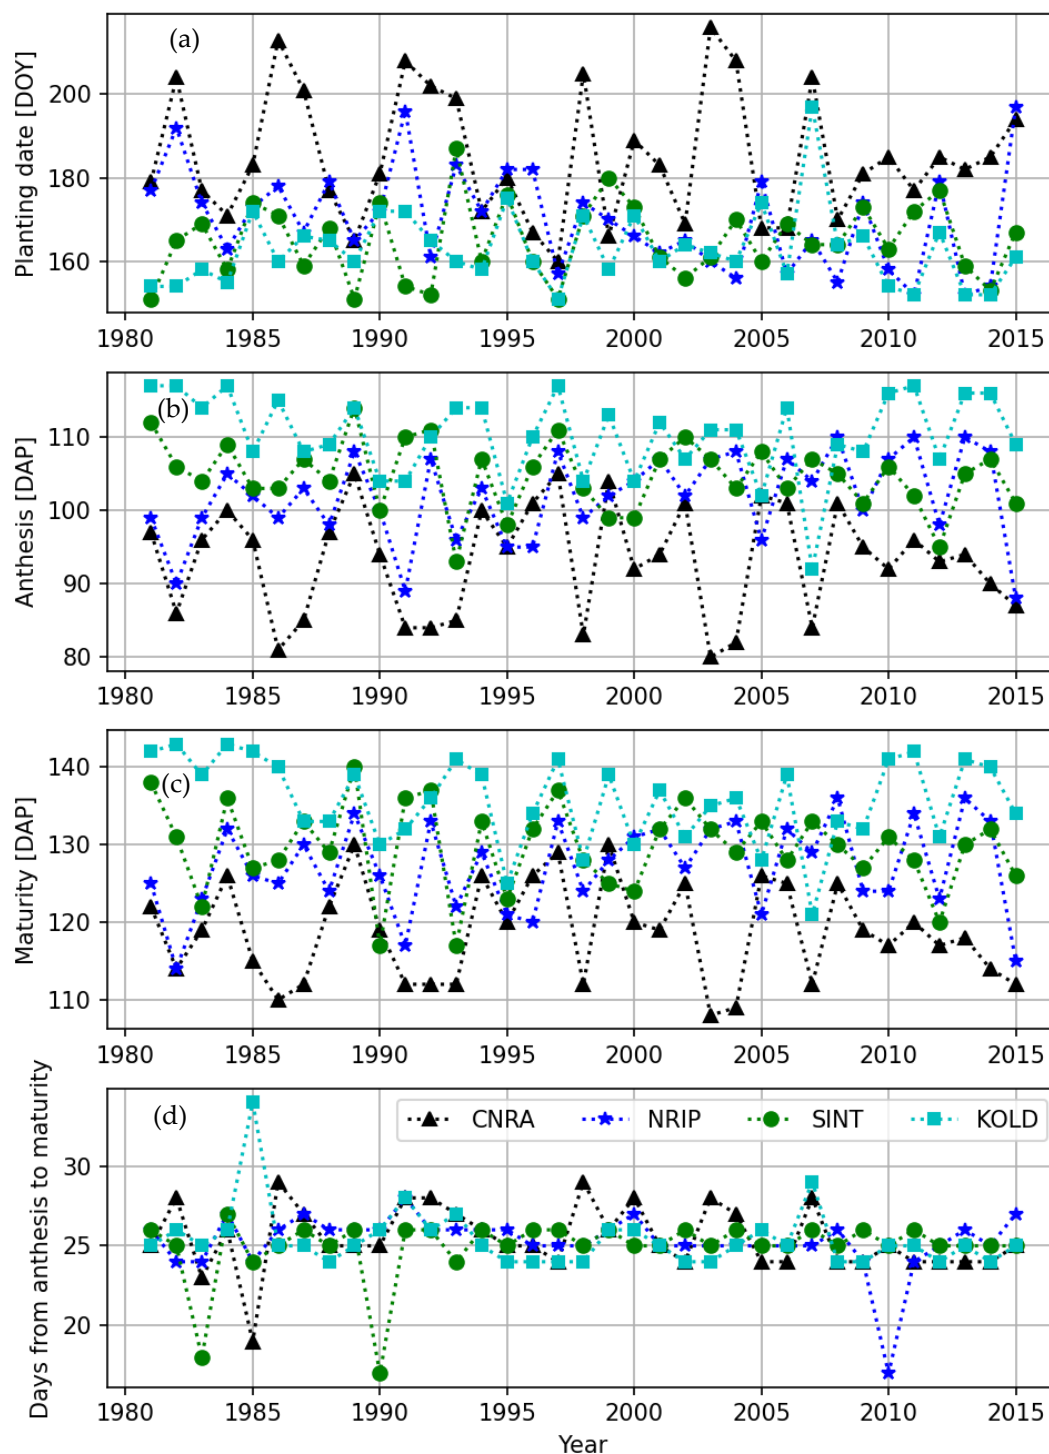

**Figure S1.** Inter-annual variation of simulated soil moisture-based planting dates (a), anthesis dates (b), maturity dates (c), and duration from anthesis to maturity (d) of Fadda sorghum cultivars at four target locations.

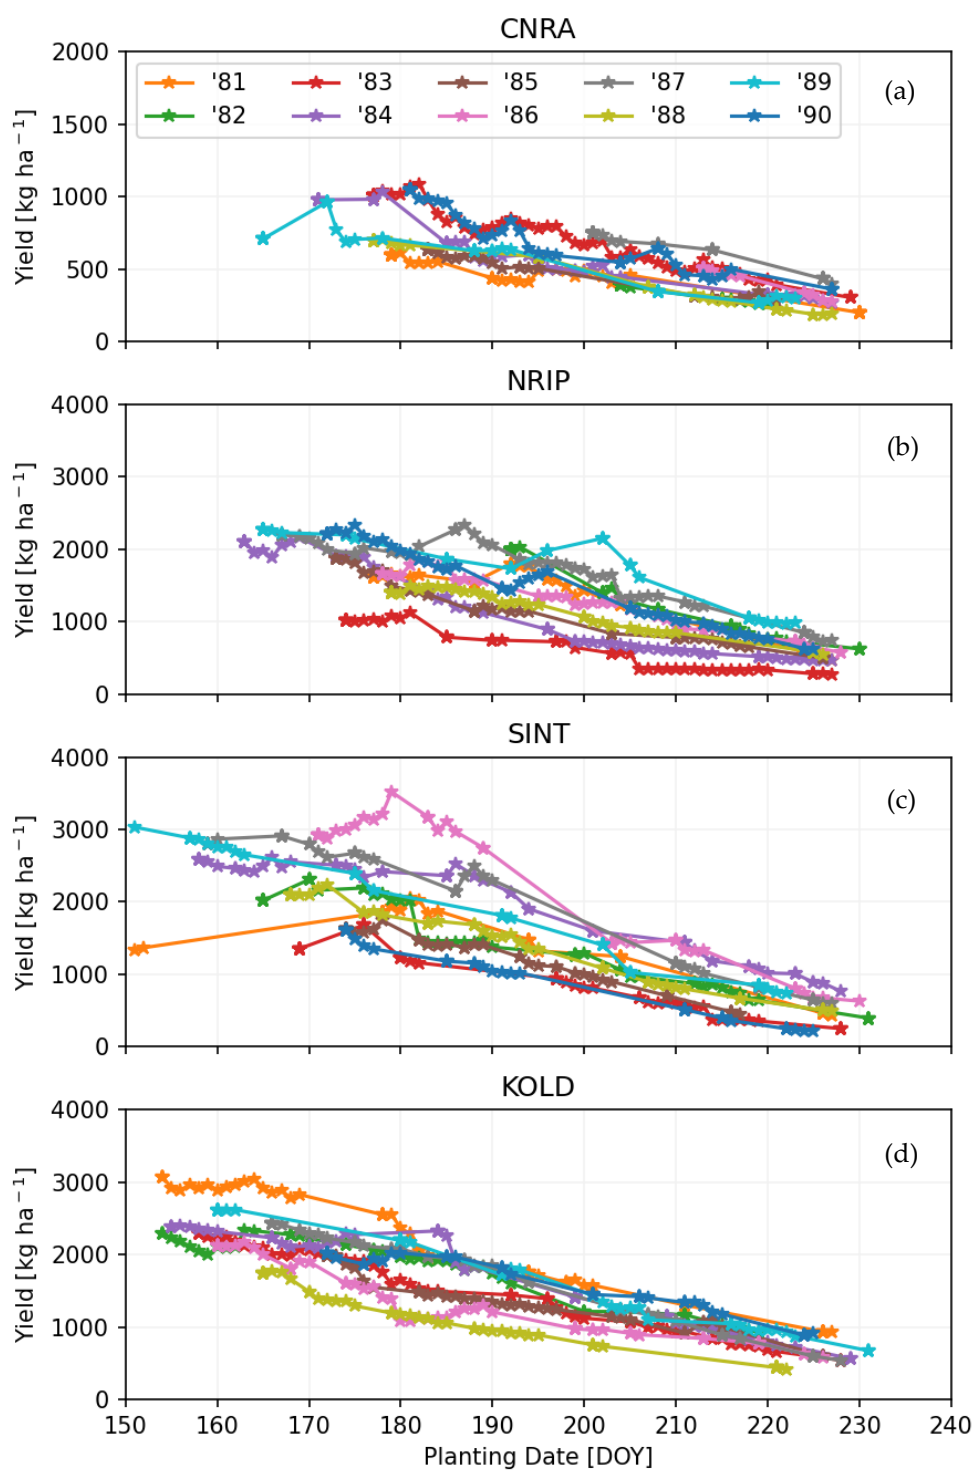

**Figure S2.** Simulated sorghum yield with automatic planting dates determined by shifting planting windows day by day, for 4 target locations: CNRA (a), NRIP (b), SINT(c) and KOLD (d) represent Bambey, Niore du Rip, Sinthiou Malème and Kolda, respectively. Different colors represent different years from 1981 to 1990.

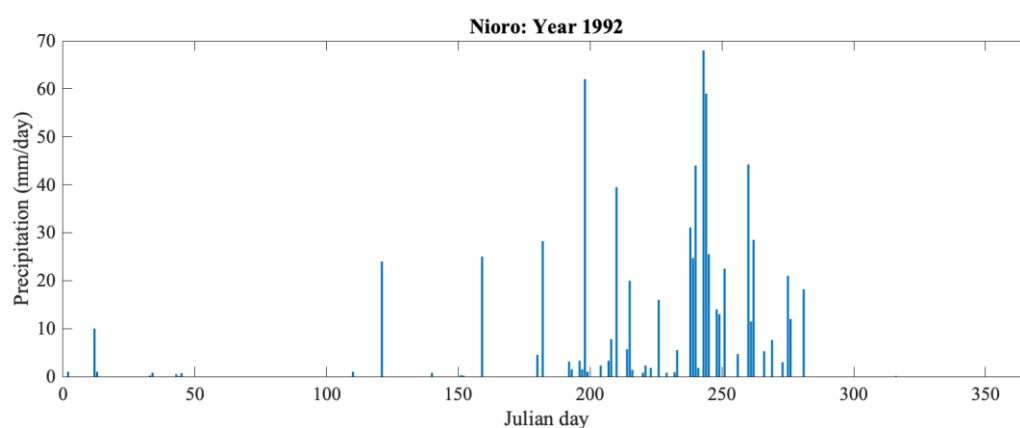

**Figure S3.** Rainfall in NRIP in 1992.

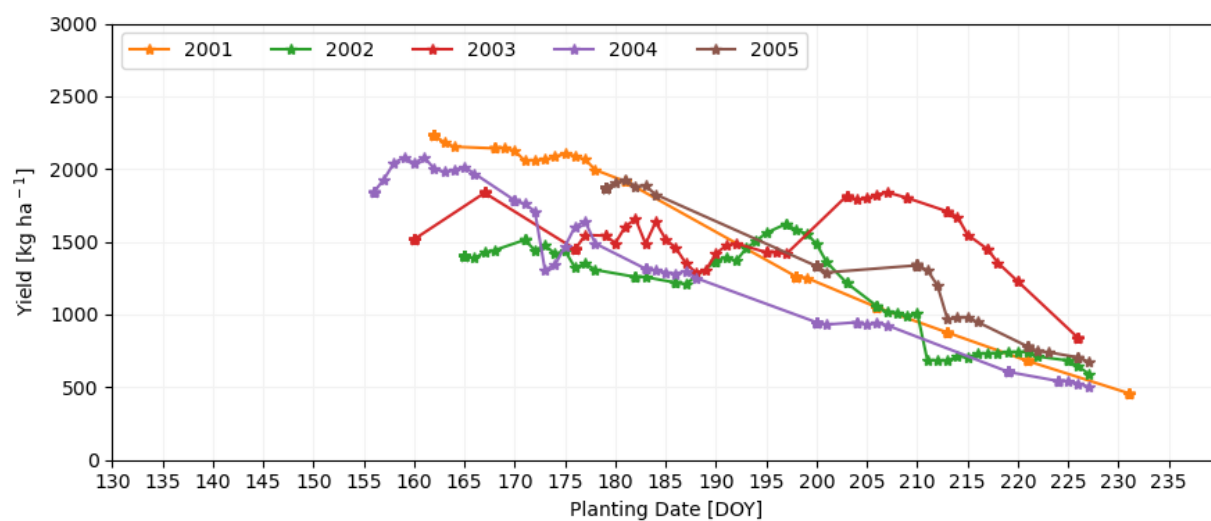

**Figure S4.** Simulated sorghum yield with automatic planting dates determined by shifting planting windows day by day at NRIP for selected years (2001-2005).

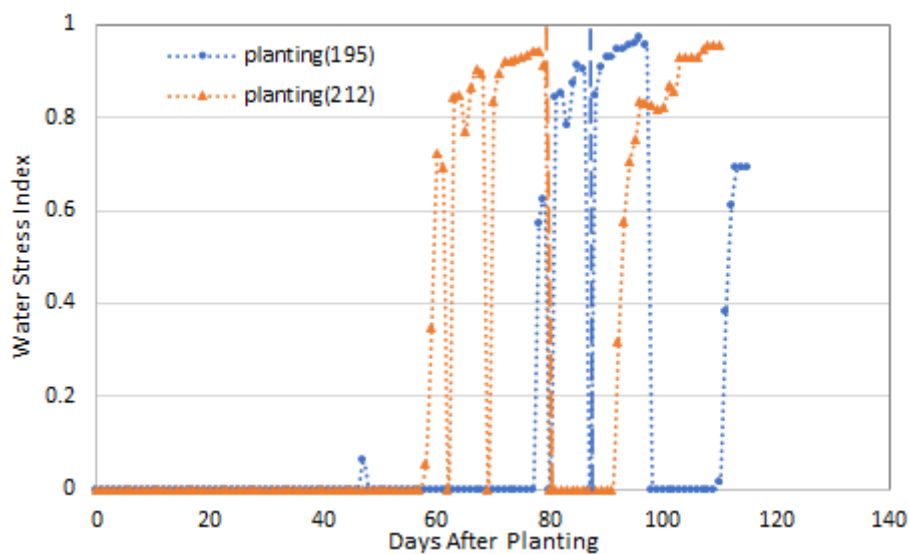

**Figure S5.** Simulated water stress indices in NRIP with semi-optimal planting onset dates for two cases: planting on DOY 195 vs. DOY 212 in 2003. Note that the water stress index is computed as 1 minus water deficiency, where water deficiency is the ratio of supply to potential demand. The higher water stress index indicates less water supply for root water uptake hindering crop growth. Vertical dashed lines indicate anthesis dates.
